# Supplementary material
Source: publisher site journal article supplement (https://www.dovepress.com/article/301500)
Supplement: Supplementary file 1 [file get_supplementary_file.php]

**Supplementary Table 1. Univariate and multivariate analyses of overall survival (OS).**

|  |  | **OS** | | | | | | |
| --- | --- | --- | --- | --- | --- | --- | --- | --- |
|  |  | **Univariate analysis** |  |  |  | **Multivariate analysis** |  |  |
| **Factors** | **n=125** | **HR (95% CI)** |  | ***P-*value** |  | **HR (95% CI)** |  | ***P-*value** |
| Age (years)  ≥75/<75 | 15/110 | 1.06 (0.55-2.06) |  | 0.8577 |  |  |  |  |
| Performance status  2-4/0, 1 | 11/104 | 2.95 (1.47-5.94) |  | 0.0014 |  | 3.67 (1.80-7.49) |  | 0.0004 |
| Sex  Female/Male | 24/101 | 1.43 (0.85-2.42) |  | 0.1811 |  |  |  |  |
| Smoking history  Never-smoker/Smoker | 19/106 | 1.29 (0.71-2.33) |  | 0.4025 |  |  |  |  |
| Histological type  Adenocarcinoma/Others | 77/48 | 1.00 (0.64-1.56) |  | 0.9929 |  |  |  |  |
| Line of therapy  3rd/1st, 2nd | 71/54 | 2.05 (1.29-3.26) |  | 0.0023 |  | 2.26 (1.41-3.62) |  | 0.0007 |
| TrAE  Not occurred/Occurred | 42/83 | 1.63 (1.04-2.54) |  | 0.0327 |  |  |  |  |
| PD-L1 expression  <50% or unknown/≥50% | 80/45 | 1.91 (1.16-3.14) |  | 0.0109 |  |  |  |  |

HR, hazard ratio; TrAE, treatment related adverse event; PD-L1, programmed death ligand 1; CI, confidence interval.
